# Supplementary material
Source: PubMed Central journal article supplement (PMC3834579)
Supplement: NIHMS512263-supplement-Additional_tables.pdf [file NIHMS512263-supplement-Additional_tables.pdf]

**eTable 1.** ICD codes for outcomes of interest

| Outcome                 | ICD 9 code* | ICD 10 code** |
|-------------------------|-------------|---------------|
| Cardiovascular disease  | 390-459     | I00-I78       |
| Ischemic heart disease  | 410-414     | I20-I25       |
| Stroke                  | 430-438     | I60-69        |
| Cancer                  | 140-239     | C00-C97       |
| Lung cancer             | 162         | C33-34        |
| Gastrointestinal cancer | 150-159     | C15-25        |
| Esophageal cancer       | 150         | C15           |
| Stomach cancer          | 151         | C16           |
| Pancreatic cancer       | 157         | C25           |
| Respiratory disease     | 460-519     | J00-98        |

\* ICD 9 codes were used from 1988-1998

\*\* ICD 10 codes were used from 1999-2006 (last year of follow-up)

**eTable 2. Risk of All-Cause, Cardiovascular Disease, Cancer, and Respiratory Disease Mortality in Relation to *H pylori* Status in NHANES III**

|                               | HR and 95% CI for total and cause-specific mortality<br>by <i>H pylori/cagA</i> status |                                                       |                                                       | HR and 95% CI for total and cause-<br>specific mortality by <i>H pylori</i> status |                              |
|-------------------------------|----------------------------------------------------------------------------------------|-------------------------------------------------------|-------------------------------------------------------|------------------------------------------------------------------------------------|------------------------------|
|                               | <i>H pylori</i> <sup>-</sup> <i>cagA</i> <sup>-</sup>                                  | <i>H pylori</i> <sup>+</sup> <i>cagA</i> <sup>-</sup> | <i>H pylori</i> <sup>+</sup> <i>cagA</i> <sup>+</sup> | <i>H pylori</i> <sup>-</sup>                                                       | <i>H pylori</i> <sup>+</sup> |
| Follow-up person years        | 46678.0                                                                                | 19475.6                                               | 39776.4                                               | 74820.9                                                                            | 72975.1                      |
| <b>All-cause mortality</b>    |                                                                                        |                                                       |                                                       |                                                                                    |                              |
| Deaths, No.                   | 655                                                                                    | 530                                                   | 838                                                   | 673                                                                                | 1382                         |
| Model 1 <sup>*</sup>          | 1.00 (ref)                                                                             | 1.15 (0.92-1.43)                                      | 1.06 (0.87-1.28)                                      | 1.00 (ref)                                                                         | 1.10 (0.92-1.31)             |
| Model 2 <sup>†</sup>          | 1.00 (ref)                                                                             | 1.06 (0.87-1.29)                                      | 0.98 (0.81-1.18)                                      | 1.00 (ref)                                                                         | 1.01 (0.86-1.18)             |
| <b>Cardiovascular disease</b> |                                                                                        |                                                       |                                                       |                                                                                    |                              |
| Deaths, No.                   | 287                                                                                    | 241                                                   | 345                                                   | 288                                                                                | 587                          |
| Model 1 <sup>*</sup>          | 1.00 (ref)                                                                             | 1.00 (0.72-1.39)                                      | 0.92 (0.76-1.12)                                      | 1.00 (ref)                                                                         | 0.96 (0.76-1.20)             |
| Model 2 <sup>†</sup>          | 1.00 (ref)                                                                             | 0.94 (0.68-1.31)                                      | 0.85 (0.70-1.04)                                      | 1.00 (ref)                                                                         | 0.89 (0.71-1.12)             |
| <b>Ischemic heart disease</b> |                                                                                        |                                                       |                                                       |                                                                                    |                              |
| Deaths, No.                   | 177                                                                                    | 138                                                   | 197                                                   | 177                                                                                | 335                          |
| Model 1 <sup>*</sup>          | 1.00 (ref)                                                                             | 0.98 (0.68-1.40)                                      | 0.98 (0.74-1.31)                                      | 1.00 (ref)                                                                         | 0.98 (0.74-1.29)             |
| Model 2 <sup>†</sup>          | 1.00 (ref)                                                                             | 0.93 (0.66-1.31)                                      | 0.94 (0.71-1.24)                                      | 1.00 (ref)                                                                         | 0.94 (0.72-1.21)             |
| <b>Stroke</b>                 |                                                                                        |                                                       |                                                       |                                                                                    |                              |
| Deaths, No.                   | 49                                                                                     | 49                                                    | 61                                                    | 49                                                                                 | 110                          |
| Model 1 <sup>*</sup>          | 1.00 (ref)                                                                             | 1.05 (0.61-1.79)                                      | 0.54 (0.32-0.90)                                      | 1.00 (ref)                                                                         | 0.75 (0.49-1.15)             |
| Model 2 <sup>†</sup>          | 1.00 (ref)                                                                             | 1.00 (0.58-1.72)                                      | 0.45 (0.27-0.75)                                      | 1.00 (ref)                                                                         | 0.67 (0.44-1.04)             |
| <b>All cancer</b>             |                                                                                        |                                                       |                                                       |                                                                                    |                              |
| Deaths, No.                   | 158                                                                                    | 109                                                   | 190                                                   | 158                                                                                | 301                          |
| Model 1 <sup>*</sup>          | 1.00 (ref)                                                                             | 1.06 (0.73-1.54)                                      | 0.98 (0.72-1.33)                                      | 1.00 (ref)                                                                         | 1.02 (0.78-1.33)             |
| Model 2 <sup>†</sup>          | 1.00 (ref)                                                                             | 0.97 (0.67-1.40)                                      | 0.93 (0.69-1.25)                                      | 1.00 (ref)                                                                         | 0.95 (0.73-1.25)             |
| <b>Lung cancer</b>            |                                                                                        |                                                       |                                                       |                                                                                    |                              |
| Deaths, No.                   | 51                                                                                     | 32                                                    | 52                                                    | 51                                                                                 | 84                           |

|                                |                   |                     |                    |                   |                    |
|--------------------------------|-------------------|---------------------|--------------------|-------------------|--------------------|
| Model 1*                       | 1.00 (ref)        | 0.83 (0.43-1.60)    | 0.83 (0.47-1.46)   | 1.00 (ref)        | 0.82 (0.48-1.42)   |
| Model 2†                       | 1.00 (ref)        | 0.70 (0.35-1.38)    | 0.77 (0.39-1.53)   | 1.00 (ref)        | 0.74 (0.40-1.37)   |
| <b>Gastrointestinal cancer</b> |                   |                     |                    |                   |                    |
| Deaths, No.                    | 28                | 25                  | 50                 | 28                | 76                 |
| Model 1*                       | 1.00 (ref)        | 0.93 (0.43-1.98)    | 1.42 (0.76-2.68)   | 1.00 (ref)        | 1.21 (0.68-2.14)   |
| Model 2†                       | 1.00 (ref)        | 0.83 (0.39-1.78)    | 1.14 (0.55-2.34)   | 1.00 (ref)        | 1.00 (0.55-1.84)   |
| <b>Respiratory disease</b>     |                   |                     |                    |                   |                    |
| Deaths, No.                    | 74                | 51                  | 81                 | 74                | 133                |
| Model 1*                       | 1.00 (ref)        | 0.77 (0.51-1.16)    | 0.98 (0.66-1.44)   | 1.00 (ref)        | 0.90 (0.67-1.20)   |
| Model 2†                       | 1.00 (ref)        | 0.70 (0.48-1.03)    | 1.00 (0.64-1.56)   | 1.00 (ref)        | 0.86 (0.62-1.20)   |
| <b>Colorectal cancer*</b>      |                   |                     |                    |                   |                    |
| Deaths, No.                    | 12                | 11                  | 21                 | 12                | 32                 |
| Model 1†                       | 1.0               | 0.58 (0.25-1.37)    | 1.44 (0.51-4.05)   | 1.0               | 1.07 (0.42-2.70)   |
| <b>Gastric cancer*</b>         |                   |                     |                    |                   |                    |
| Deaths, No.                    | 17 (total events) |                     |                    | 17 (total events) |                    |
| Model 1†                       | 1.0               | 17.01 (2.50-115.92) | 16.98 (3.05-94.71) | 1.0               | 17.00 (3.13-92.29) |
| <b>Esophageal cancer*</b>      |                   |                     |                    |                   |                    |
| Deaths, No.                    | 6 (total events)  |                     |                    | 6 (total events)  |                    |
| Model 1†                       | 1.0               | 0.43 (0.05-3.72)    | 0.23 (0.02-2.29)   | 1.0               | 0.31 (0.03-2.83)   |
| <b>Pancreatic cancer*</b>      |                   |                     |                    |                   |                    |
| Deaths, No.                    | 23 (total events) |                     |                    | 8                 | 15                 |
| Model 1†                       | 1.0               | 0.20 (0.05-0.90)    | 0.89 (0.39-2.02)   | 1.0               | 0.59 (0.26-1.36)   |

Abbreviations: HR, hazard ratio; CI, confidence interval.

\*HRs were adjusted for age and sex.

†HRs were adjusted for age and sex, educational attainment (years), BMI (<25, ≥25, missing), race/ethnicity, and smoking status (never/past/current).

**eTable 3. Raw p-values and FDR-corrected p-values for all the comparisons conducted in the study**

| Outcome tested          | <i>H. pylori</i> status          | P –value | FDR rate |
|-------------------------|----------------------------------|----------|----------|
| Total mortality         | <i>H. pylori</i> – <i>cagA</i> - | 0.75     | 0.93     |
|                         | <i>H. pylori</i> – <i>cagA</i> + | 0.75     | 0.93     |
|                         | <i>H. pylori</i> +               | 0.99     | 0.99     |
| CVD                     | <i>H. pylori</i> – <i>cagA</i> - | 0.78     | 0.94     |
|                         | <i>H. pylori</i> – <i>cagA</i> + | 0.1      | 0.37     |
|                         | <i>H. pylori</i> +               | 0.28     | 0.67     |
| Ischemic disease        | <i>H. pylori</i> – <i>cagA</i> - | 0.72     | 0.93     |
|                         | <i>H. pylori</i> – <i>cagA</i> + | 0.51     | 0.81     |
|                         | <i>H. pylori</i> +               | 0.52     | 0.81     |
| Stroke                  | <i>H. pylori</i> – <i>cagA</i> - | 0.872    | 0.95     |
|                         | <i>H. pylori</i> – <i>cagA</i> + | 0.004    | 0.045    |
|                         | <i>H. pylori</i> +               | 0.102    | 0.37     |
| All cancer              | <i>H. pylori</i> – <i>cagA</i> - | 0.68     | 0.93     |
|                         | <i>H. pylori</i> – <i>cagA</i> + | 0.38     | 0.80     |
|                         | <i>H. pylori</i> +               | 0.42     | 0.81     |
| Lung cancer             | <i>H. pylori</i> – <i>cagA</i> - | 0.21     | 0.61     |
|                         | <i>H. pylori</i> – <i>cagA</i> + | 0.04     | 0.24     |
|                         | <i>H. pylori</i> +               | 0.07     | 0.36     |
| Gastrointestinal cancer | <i>H. pylori</i> – <i>cagA</i> - | 0.71     | 0.93     |
|                         | <i>H. pylori</i> – <i>cagA</i> + | 0.58     | 0.87     |
|                         | <i>H. pylori</i> +               | 0.82     | 0.95     |
| Respiratory disease     | <i>H. pylori</i> – <i>cagA</i> - | 0.08     | 0.36     |
|                         | <i>H. pylori</i> – <i>cagA</i> + | 0.92     | 0.95     |
|                         | <i>H. pylori</i> +               | 0.45     | 0.81     |
| Colorectal cancer       | <i>H. pylori</i> – <i>cagA</i> - | 0.22     | 0.61     |
|                         | <i>H. pylori</i> – <i>cagA</i> + | 0.48     | 0.81     |
|                         | <i>H. pylori</i> +               | 0.87     | 0.95     |
| Gastric cancer          | <i>H. pylori</i> – <i>cagA</i> - | 0.005    | 0.045    |
|                         | <i>H. pylori</i> – <i>cagA</i> + | 0.002    | 0.045    |

|                      |                                  |        |       |
|----------------------|----------------------------------|--------|-------|
| Esophageal<br>cancer | <i>H. pylori</i> +               | 0.0025 | 0.045 |
|                      | <i>H. pylori</i> - <i>cagA</i> - | 0.44   | 0.81  |
|                      | <i>H. pylori</i> - <i>cagA</i> + | 0.22   | 0.61  |
| Pancreatic<br>cancer | <i>H. pylori</i> +               | 0.31   | 0.70  |
|                      | <i>H. pylori</i> - <i>cagA</i> - | 0.04   | 0.24  |
|                      | <i>H. pylori</i> - <i>cagA</i> + | 0.9    | 0.95  |
|                      | <i>H. pylori</i> +               | 0.24   | 0.62  |

---
